# Supplementary material
Source: PubMed Central journal article supplement (PMC2900636)
Supplement: 1005347107_pnas.1005347107_SI.pdf [file 1005347107_pnas.1005347107_SI.pdf]

# Supporting Information

Ducka et al. 10.1073/pnas.1005347107

## SI Text

**Abbreviations.** SpirD, the D WH2 domain of Spire (residues 461–480); SpirCD, the Spire containing CD WH2 domains (residues 432–480); SpirBCD, the Spire containing triple WH2 domains (BCD, residues 396–480); SpirABCD, the Spire containing quadruple WH2 domains (ABCD, residues 371–480); SpirDDD, the artificial Spire WH2 construct comprising three identical D repeats.

**Materials and Methods. Preparation of proteins.** The vectors (pGEX-6P-1) containing *Drosophila* Spire constructs were transformed into BL21(DE3) BL21-CodonPlus(DE3)-RIL expression cells (Stratagene) and grown for approximately 4 h at 37 °C until the OD at 600 nm reached 0.9. Protein expression was carried out at 18 °C for 14–16 h after induction with 0.5 mM isopropyl- $\beta$ -thiogalactopyranoside (Fermentas). The cells were harvested by centrifugation at 5,000 rpm for 15 min, and pellets were resuspended in PBS containing 1 mM EDTA, 1 mM DTT, and 0.5 mM PMSF. The lysis was performed by sonication followed by centrifugation at 20,000 rpm for 30 min. The supernatant containing GST-tagged Spire constructs was applied on Glutathione Sepharose 4 Fast Flow beads (GE Healthcare). Bound protein was washed with 50 mM Tris (pH 7.0), 150 mM NaCl, 1 mM EDTA, and 1 mM DTT and cleaved by PreScission protease (GE Healthcare) to release the Spire protein. The cleaved Spire proteins were collected, concentrated, and further purified by Superdex 75 (SpirCD, SpirBCD, SpirDDD, and SpirABCD) or Superdex 30 (SpirC and SpirD) in PBS buffer. The His-tagged SpirNT encoded in a pET 16b vector was expressed in BL21(DE3) Codon+ RIL and purified by Ni-NTA agarose beads (Qiagen) followed by gel filtration on Superdex 200 (GE Healthcare). The purity and homogeneity of proteins were confirmed by mass spectrometry and N-terminal Edman sequencing (data not shown). The folding properties of all constructs were further analyzed by 1D NMR spectra recorded by a 650-MHz magnet. AP-actin (*Drosophila* 5C A204E/P243K cytoplasmic actin) was prepared as described by Rould et al. (1). The rabbit skeletal muscle actin was extracted according to the method of Spudich and Watt (2) and further purified on a Sephacryl S-200 gel filtration column (GE Healthcare). Latrunculin B (Sigma) was used to prevent spontaneous polymerization of rabbit actin.

**Crystallization.** Purified SpirABCD, SpirBCD, as well as SpirDDD, and SpirCD were mixed with AP-actin at a molar ratio of 1:4.1, 1:3.1, and 1:2:1, respectively, and separated by gel filtration on Superdex 200 (GE Healthcare) in 5 mM Tris (pH 7.0), 50 mM NaCl, 0.2 mM ATP, and 5 mM  $\beta$ -mercaptoethanol. Fractions from the peaks shown in Fig. S3A were analyzed by SDS-PAGE, pooled, and concentrated to 10–12 mg/mL. The complexes were crystallized both at 4 °C and 20 °C in several crystallization conditions, using the sitting and hanging drop vapor diffusion method. The 2- to 3- $\mu$ L drops consisted of a 1:1 or 2:1 (vol/vol) mixture of protein solution and a well solution. Crystals appeared after 2 days and grew to the final size after 2–4 weeks of incubation. The best diffracting crystals of the SpirABCD/AP-actin, SpirBCD/AP-actin, and SpirDDD/AP-actin complexes grew in 0.2-M ammonium formate pH 6.6, 20% PEG 3350, and the crystals of SpirCD/AP-actin appeared in 0.2-M ammonium sulphate, 0.1-M Mes pH 6.5, 20% PEG 8000. All crystals were soaked in cryosolutions containing mother liquor supplemented with 20% 2-methyl-2,4-pentanediol or glycerol and were flash frozen in liquid nitrogen. Crystals of the SpirD/actin-latrunculin B complex appeared after one week at 4 °C in the solution containing 0.2 M magnesium formate, pH 5.9 and 20% PEG 3350. Crystals were treated as described above. To exclude the possibility of proteolytic cleavage of Spire during crystallization, we dissolved several crystals of the complexes and analyzed them by SDS-PAGE and mass spectrometry, proving that both SpirCD and SpirBCD remain intact during crystallization.

**Data collection and structure determination.** X-ray datasets of the SpirD/actin-latrunculin B (1.6 Å), SpirBCD/AP-actin (2.0 Å), SpirABCD/AP-actin (2.2 Å), SpirDDD/AP-actin (2.1 Å), and SpirCD/AP-actin (2.6 Å) were collected on the Swiss Light Source beamline PXII at the Paul Scherrer Institut. The datasets were integrated, scaled, and merged by XDS and XSCALE programs (3) in space group P2<sub>1</sub>2<sub>1</sub>2<sub>1</sub> for SpirD-actin-latrunculin B, P6<sub>5</sub> for SpirCD/AP-actin, SpirABCD/AP-actin, and SpirDDD/AP-actin, and P2<sub>1</sub> for SpirBCD/AP-actin (Table S1). The structures were determined by molecular replacement using the Molrep program from the CCP4 suite (4) and the structures of AP-actin and rabbit skeletal muscle actin complexed with latrunculin A as a search model. Model building and refinement were carried out with the program XtalView/Xfit (5) and REFMAC5 (4). Data collection refinement and statistics are shown in the Table S1.









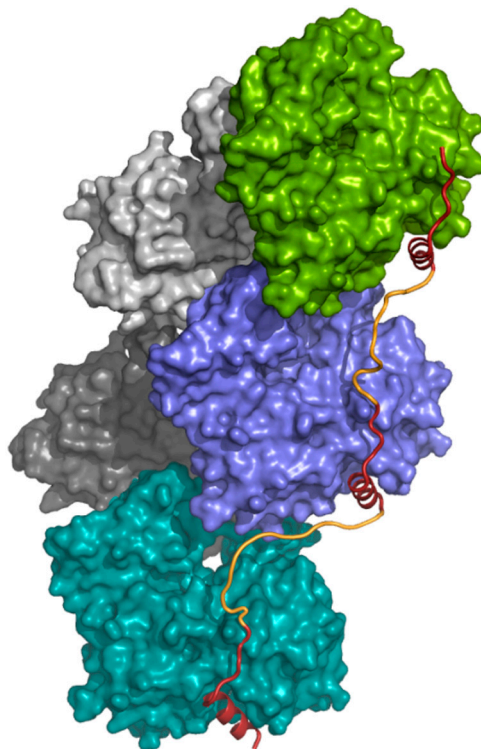

**Movie S1.** A proposed model of actin nucleation by Spire. Spire (red ribbons) aligns actin molecules (colored green, blue, cyan, and pink) into the elongated side-to-side arrangement and forms the primary nucleus. Binding of free actins (colored in gray) induces transition to the F-actin conformation, followed by elongation upon addition of actin monomers to the barbed end of the growing filament.

[Movie S1 \(WMV\)](#)

**Table S1. Data collection and refinement statistics**

|                                   | SpirD                                         | SpirCD            | SpirBCD                   | SpirABCD        | SpirDDD         |
|-----------------------------------|-----------------------------------------------|-------------------|---------------------------|-----------------|-----------------|
| <b>Data collection</b>            |                                               |                   |                           |                 |                 |
| Space group                       | P2 <sub>1</sub> 2 <sub>1</sub> 2 <sub>1</sub> | P6 <sub>5</sub> * | P2 <sub>1</sub> *         | P6 <sub>5</sub> | P6 <sub>5</sub> |
| <i>Cell constant:</i>             |                                               |                   |                           |                 |                 |
| a                                 | 52.96                                         | 125.51            | 125.30                    | 126.08          | 125.82          |
| b                                 | 71.81                                         | 125.51            | 55.95                     | 126.08          | 125.82          |
| c                                 | 100.72                                        | 56.1              | 125.37/ $\beta$ = 120.036 | 56.37           | 56.02           |
| Resolution range (Å)              | 50 – 1.5                                      | 50 – 2.6          | 50 – 2.0                  | 50 – 2.2        | 50 – 2.1        |
| Observed reflections              | 380,081                                       | 84,313            | 370,098                   | 228,321         | 266,481         |
| Unique reflections                | 49,209                                        | 11,584            | 90,708                    | 22,506          | 26,371          |
| <i>Whole resolution range:</i>    |                                               |                   |                           |                 |                 |
| Completeness (%)                  | 79.0                                          | 73.6              | 80.8                      | 76.2            | 86.4            |
| R <sub>merge</sub>                | 4.9                                           | 8.6               | 5.6                       | 6.7             | 3.0             |
| I/ $\sigma$ (I)                   | 21.4                                          | 12.6              | 19.0                      | 15.54           | 32.6            |
| <i>Last resolution shell:</i>     |                                               |                   |                           |                 |                 |
| Resolution range (Å)              | 1.5 – 1.6                                     | 2.6 – 2.8         | 2.0 – 2.1                 | 2.2 – 2.3       | 2.1 – 2.2       |
| Completeness (%)                  | 38.1                                          | 40.5              | 47.6                      | 38.5            | 36.9            |
| R <sub>merge</sub>                | 20.3                                          | 29.7              | 19.5                      | 26.9            | 23.6            |
| I/ $\sigma$ (I)                   | 4.4                                           | 4.4               | 5.0                       | 3.9             | 4.0             |
| <b>Refinement</b>                 |                                               |                   |                           |                 |                 |
| No. of reflections                | 46,688                                        | 9,765             | 78,737                    | 20,832          | 23,718          |
| Resolution (Å)                    | 39 – 1.5                                      | 20 – 2.8          | 50 – 2.0                  | 50 – 2.0        | 50 – 2.0        |
| R factor (%)                      | 17.2                                          | 24.1              | 19.0                      | 18.4            | 25.6            |
| R <sub>free</sub> (%)             | 21.6                                          | 33.0              | 23.9                      | 25.1            | 27.5            |
| Average B (Å <sup>2</sup> )       | 19.8                                          | 51.0              | 32.8                      | 42.8            | 57.8            |
| rms bond length (Å)               | 0.027                                         | 0.012             | 0.011                     | 0.018           | 0.006           |
| rms angles (°)                    | 2.4                                           | 1.5               | 1.2                       | 1.5             | 0.9             |
| <b>Content of asymmetric unit</b> |                                               |                   |                           |                 |                 |
| No. of complexes                  | 1                                             | 1                 | 3                         | 1               | 1               |
| No. of protein residues/atoms     | 367/3,418                                     | 381/2,974         | 1,132/9,613               | 377/2,912       | 378/2,967       |
| No. of solvent atoms              | 489                                           | 30                | 781                       | 142             | 63              |
| PDB Data Bank ID code             | 3MN5                                          | 3MMV              | 3MN6                      | 3MN9            | 3MN7            |

\*Space groups P6<sub>5</sub> and P2<sub>1</sub> are equivalent (See the section: Crystal structures of the SpirCD/AP-actin, SpirBCD/AP-actin, SpirDDD/AP-actin and SpirABCD/AP-actin complexes.)
